# Supplementary material
Source: publisher figshare collection journal article supplement (https://frontiersin.figshare.com/ndownloader/files/25591757)
Supplement: Supplementary file [file 25591757]

# Supplementary Material

## 1 SUPPLEMENTARY TABLES AND FIGURES

### 1.1 Figures

Comparison of DEC performance on different  $k$

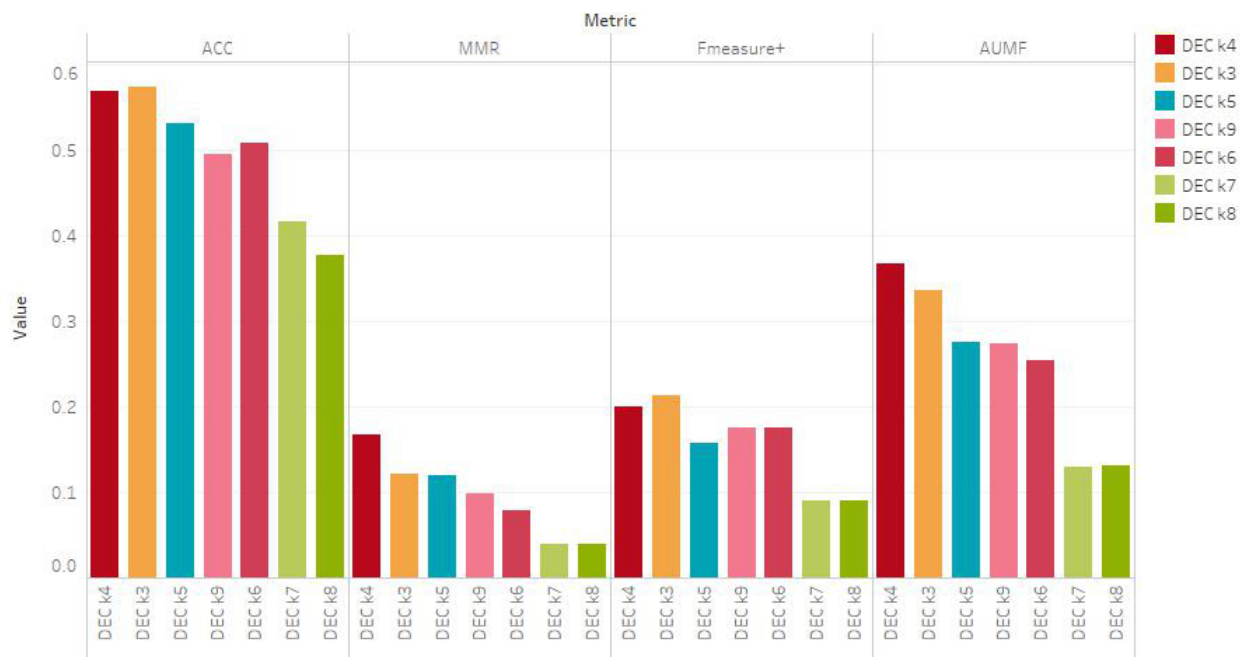

**Figure S1:** DEC performance on different  $k$ s.

## Comparison of Methods

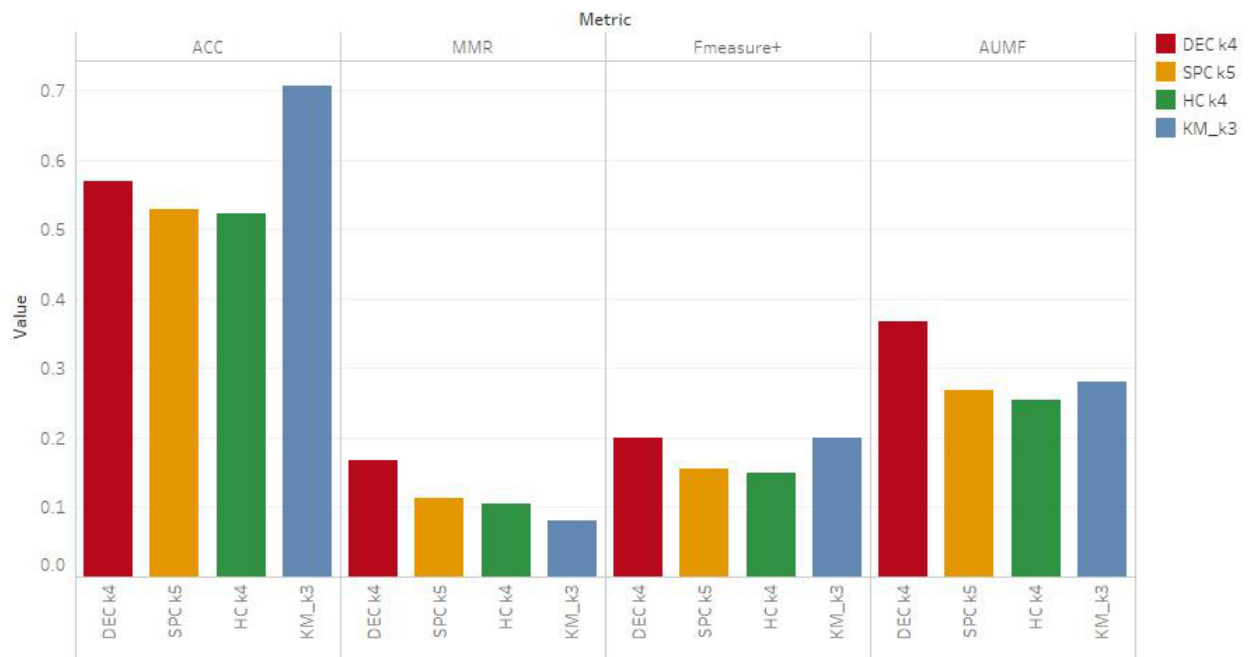

**Figure S2:** Comparison of the DEC results with other clustering methods.

*Primary*

| GENE    | Pvalue   |
|---------|----------|
| CDH1    | 7.37e-05 |
| TBX3    | 1.98e-04 |
| MAP3K1  | 2.78e-04 |
| CTCF    | 4.42e-04 |
| CBFB    | 1.32e-03 |
| PIK3CA  | 1.77e-03 |
| MED23   | 2.05e-03 |
| FBXO11  | 7.70e-03 |
| GATA3   | 9.91e-03 |
| COL4A1  | 1.17e-02 |
| GPS2    | 1.36e-02 |
| MAP4K1  | 1.76e-02 |
| RASGRF2 | 1.76e-02 |
| TAOK1   | 1.76e-02 |
| TSC1    | 2.09e-02 |
| CDKN1B  | 2.35e-02 |
| TBL1XR1 | 2.35e-02 |
| RUNX1   | 2.72e-02 |
| EFTUD2  | 3.39e-02 |
| EXT2    | 3.39e-02 |
| ITGA11  | 3.39e-02 |
| PRKCQ   | 3.39e-02 |
| PTPRJ   | 3.39e-02 |
| PIK3C2G | 3.94e-02 |
| TNC     | 3.94e-02 |
| CD22    | 4.42e-02 |
| DKK4    | 4.42e-02 |
| PRLR    | 4.42e-02 |
| TRIP10  | 4.42e-02 |
| COL5A3  | 4.82e-02 |

**Figure S3:** Top gene signature of *Primary* subtype.

*Progressive*

| GENE     | Pvalue   |
|----------|----------|
| TP53     | 3.30e-13 |
| MYC      | 6.12e-08 |
| GNAS     | 1.03e-06 |
| ERBB2    | 1.58e-06 |
| CACNA1F  | 2.34e-06 |
| FGFR3    | 4.23e-06 |
| AKT3     | 8.51e-06 |
| BRAF     | 1.71e-05 |
| RB1      | 2.33e-05 |
| MPL      | 2.52e-05 |
| AKT1     | 5.43e-05 |
| CACNA1S  | 6.99e-05 |
| FANCA    | 6.99e-05 |
| CCNE1    | 9.07e-05 |
| CCR7     | 1.13e-04 |
| CDKN2A   | 1.23e-04 |
| MACF1    | 1.47e-04 |
| EGFR     | 1.65e-04 |
| JAK1     | 2.38e-04 |
| SRSF2    | 3.12e-04 |
| LAMB4    | 3.59e-04 |
| STK11    | 3.59e-04 |
| BRCA1    | 4.10e-04 |
| ANAPC5   | 4.70e-04 |
| SPOP     | 5.79e-04 |
| CARD11   | 6.55e-04 |
| TLN1     | 6.55e-04 |
| ARID4B   | 9.39e-04 |
| COL4A6   | 9.39e-04 |
| SETDB1   | 9.39e-04 |
| KIT      | 1.07e-03 |
| BRCA2    | 1.15e-03 |
| NCOA3    | 1.23e-03 |
| CLASP2   | 1.31e-03 |
| RARB     | 1.31e-03 |
| BCL2     | 1.69e-03 |
| EZH2     | 1.84e-03 |
| LAMB1    | 1.84e-03 |
| MYB      | 1.84e-03 |
| IDH2     | 2.20e-03 |
| SKP2     | 2.52e-03 |
| DDX3X    | 2.84e-03 |
| GATA2    | 2.84e-03 |
| NCF2     | 2.84e-03 |
| ROCK2    | 2.84e-03 |
| STAT4    | 2.84e-03 |
| TNFAIP3  | 2.84e-03 |
| TNKS1BP1 | 2.84e-03 |
| IGF1R    | 3.22e-03 |
| ARID1B   | 3.41e-03 |

**Figure S4:** Top gene signature of *Progressive* subtype.



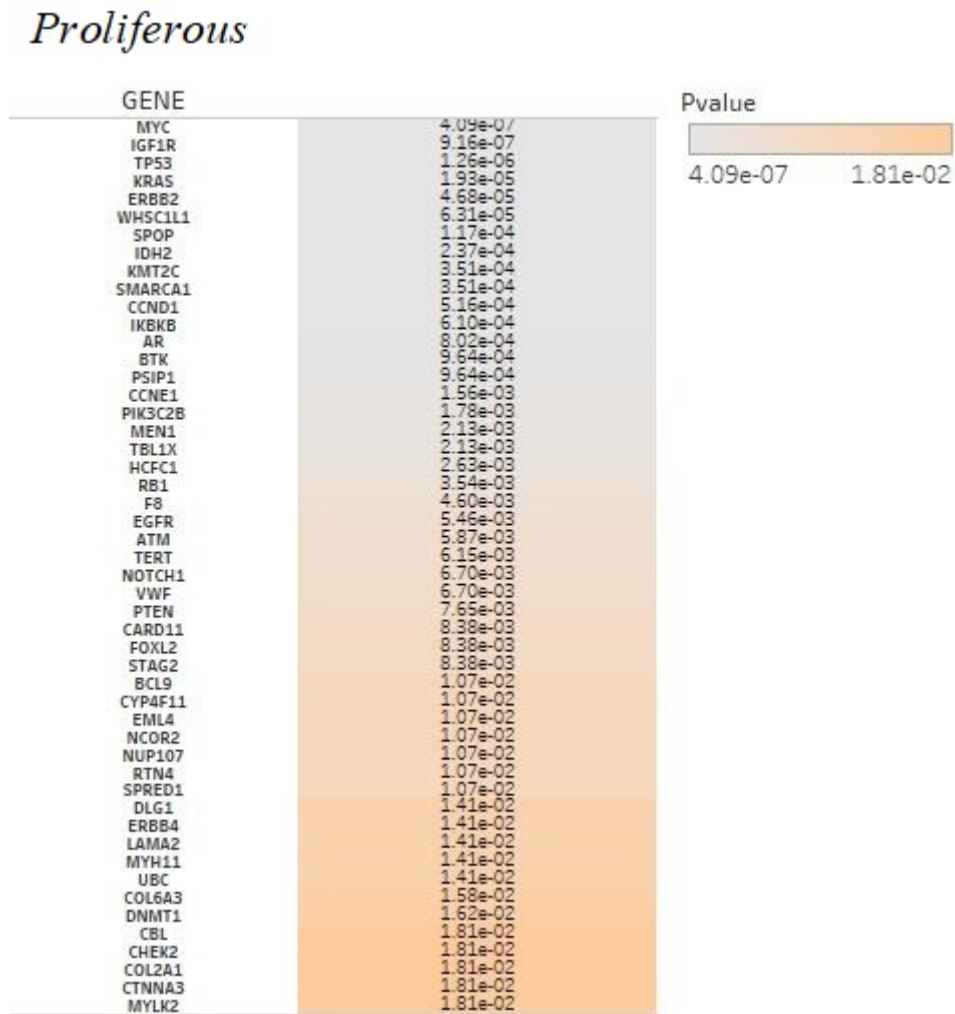

**Figure S5:** Top gene signature of *Proliferous* subtype.

*Perilous*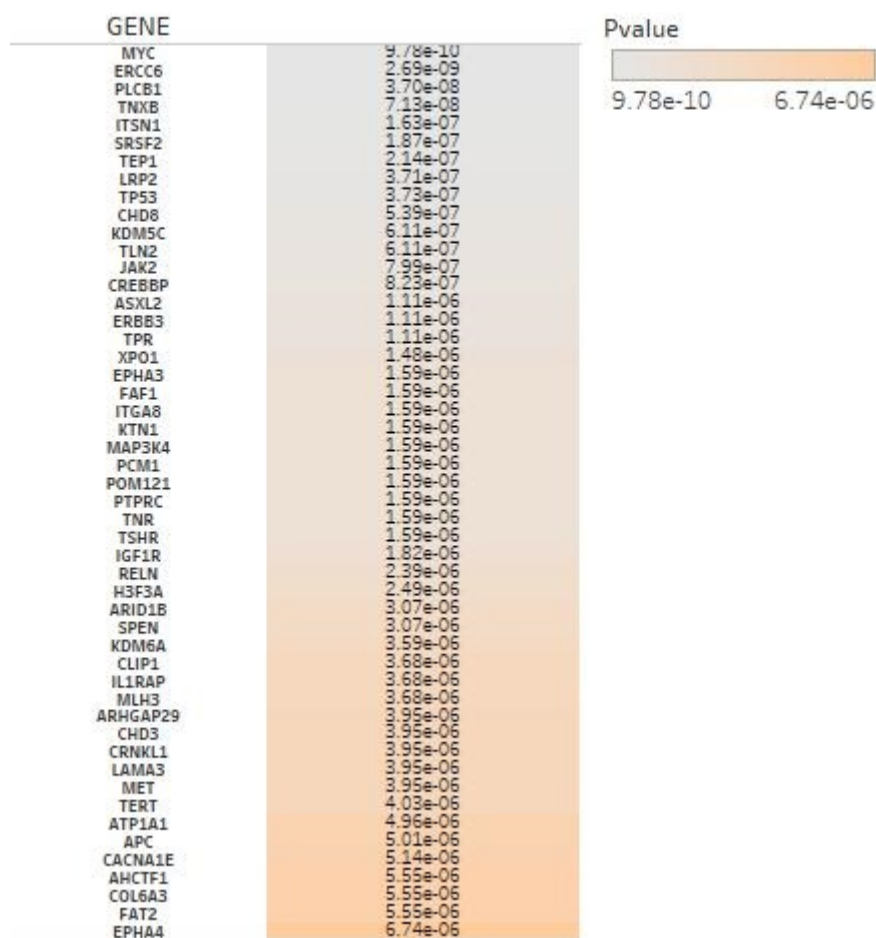Figure S6: Top gene signature of *Perilous* subtype.

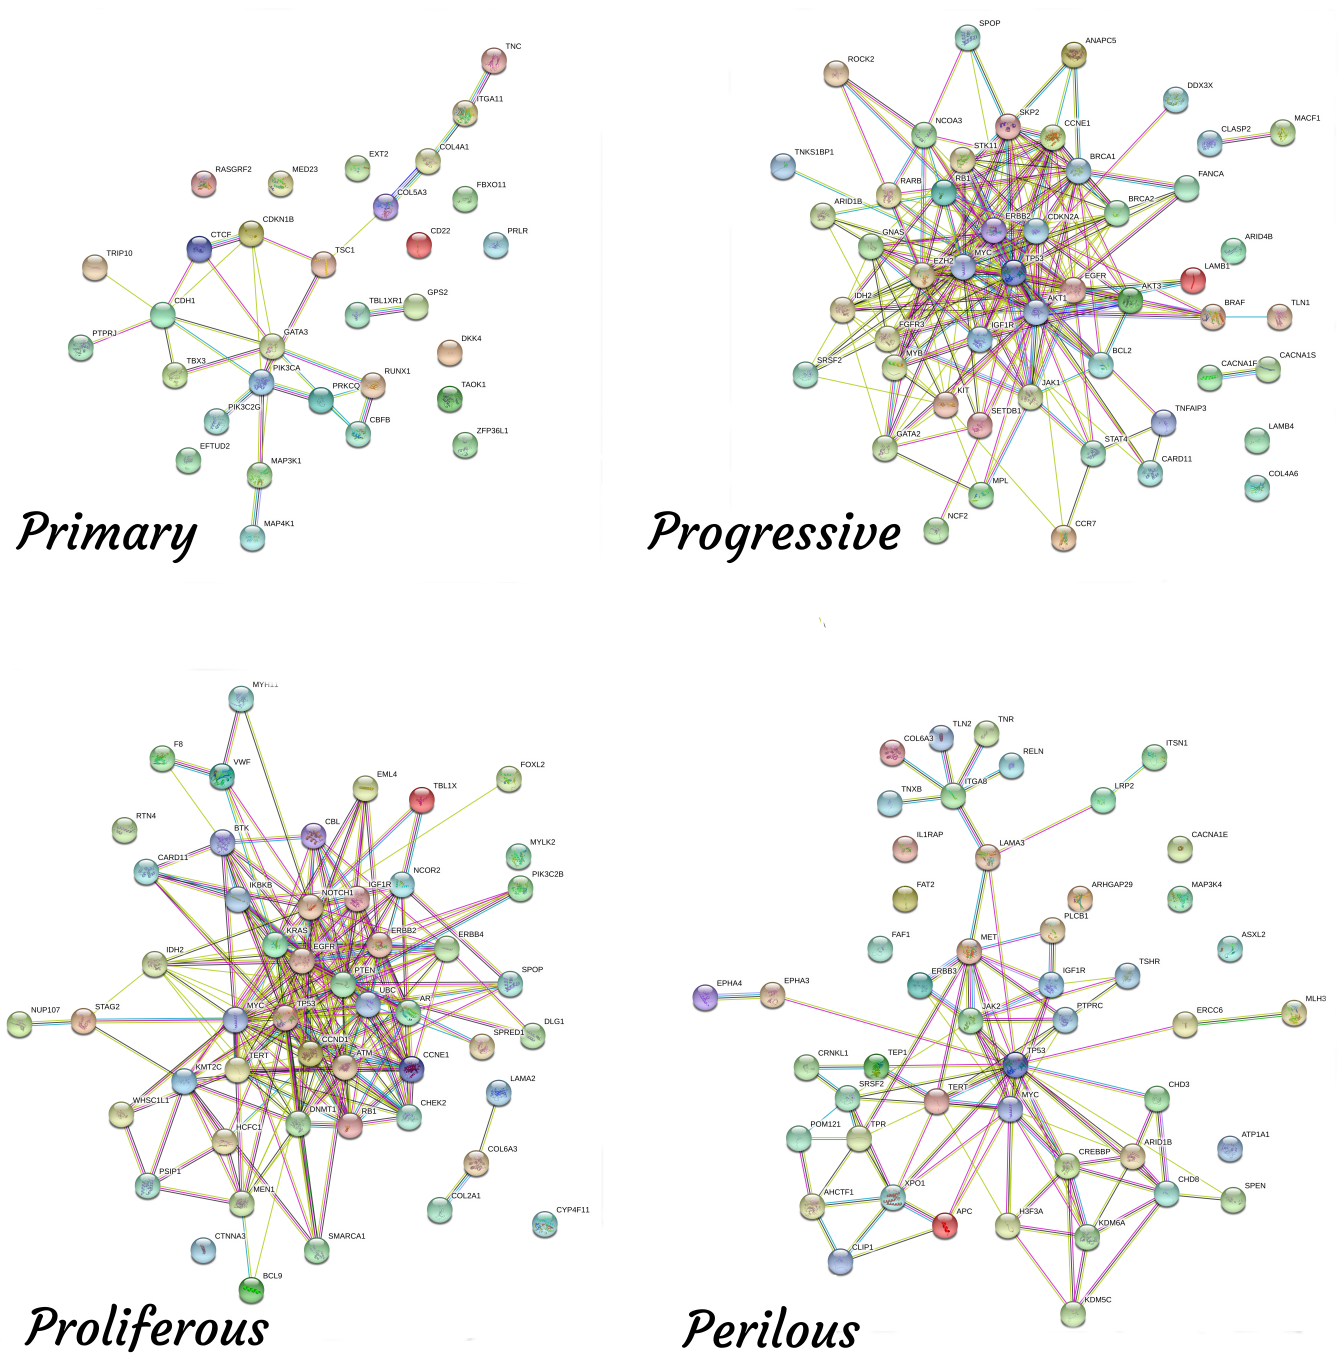

Figure S7: PPI network for each subtype.

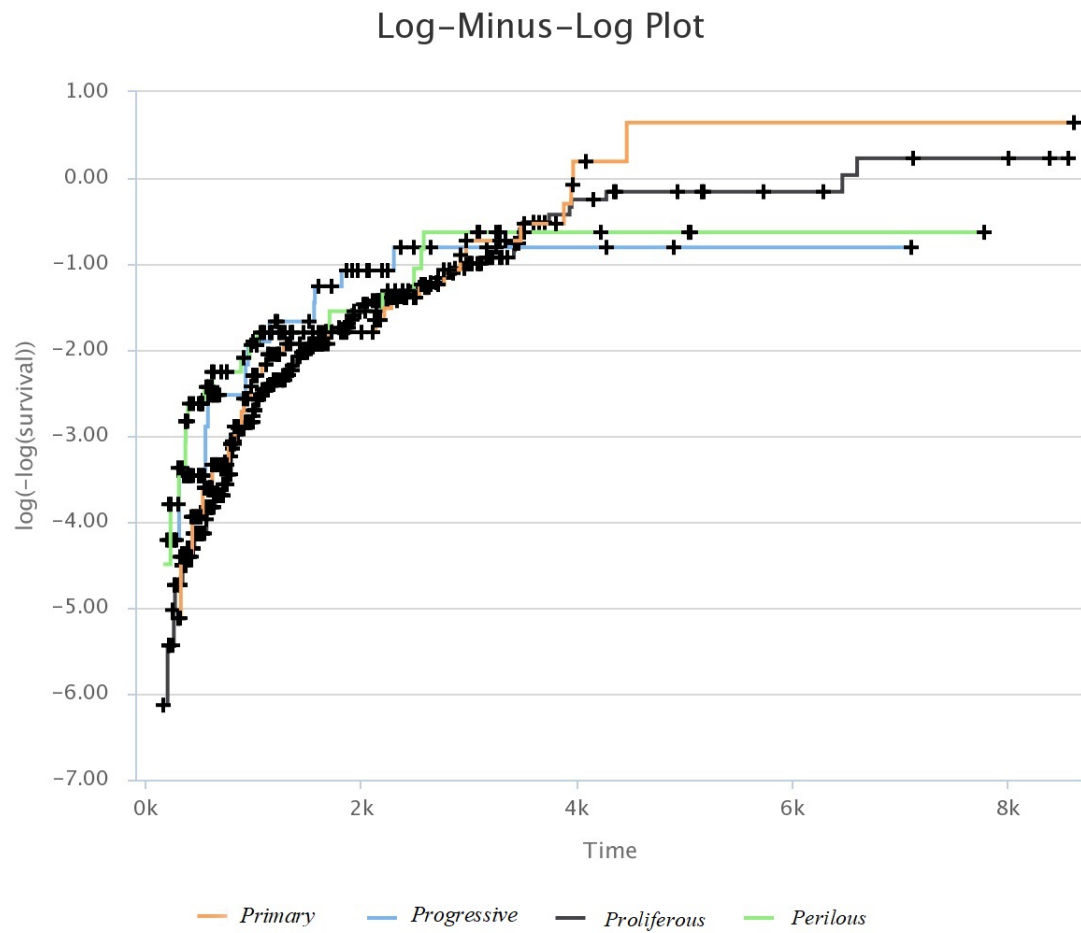

**Figure S8:** Cox hazard survival diagram.

| Breast Carcinoma Estrogen Receptor Status |          |          |
|-------------------------------------------|----------|----------|
|                                           | Negative | Positive |
| <i>Primary</i>                            | 49       | 125      |
| <i>Progressive</i>                        | 35       | 40       |
| <i>Proliferous</i>                        | 53       | 412      |
| <i>Perilous</i>                           | 44       | 49       |

**Figure S9:** Contingency table of ER status relation with discovered subtypes ( $p\text{-value} < 2.2e - 16$  by Chi-square test and  $p\text{-value} = 1e - 06$  by Fisher's exact test).

| Breast Carcinoma Progesterone Receptor Status |          |          |
|-----------------------------------------------|----------|----------|
|                                               | Negative | Positive |
| <i>Primary</i>                                | 64       | 109      |
| <i>Progressive</i>                            | 47       | 29       |
| <i>Proliferous</i>                            | 93       | 369      |
| <i>Perilous</i>                               | 54       | 39       |

**Figure S10:** Contingency table of PR status relation with discovered subtypes ( $p\text{-value} < 2.2e - 16$  by the Chi-square test and  $p\text{-value} = 1e - 06$  by the Fisher's exact test.)

| Lab Proc Her2 Neu Immunohistochemistry Receptor Status |           |          |          |
|--------------------------------------------------------|-----------|----------|----------|
|                                                        | Equivocal | Negative | Positive |
| <i>Primary</i>                                         | 24        | 88       | 44       |
| <i>Progressive</i>                                     | 5         | 40       | 22       |
| <i>Proliferous</i>                                     | 91        | 265      | 44       |
| <i>Perilous</i>                                        | 15        | 44       | 23       |

**Figure S11:** Contingency table of HER2 status relation with discovered subtypes ( $p - value = 1.445e - 07$  by the chi-square test and  $p - value = 1e - 06$  by the Fisher's exact test).

| TP53 Mutation Status |        |       |
|----------------------|--------|-------|
|                      | p53mut | p53wt |
| <i>Primary</i>       | 88     | 94    |
| <i>Progressive</i>   | 43     | 34    |
| <i>Proliferous</i>   | 92     | 396   |
| <i>Perilous</i>      | 61     | 37    |

**Figure S12:** Contingency table of TP53 status relation with discovered subtypes ( $p - value < 2.2e -$  in both the Chi-squared test and the Fisher's exact test).

| Histological Type  |                               |                                |                     |                       |                 |                    |                |
|--------------------|-------------------------------|--------------------------------|---------------------|-----------------------|-----------------|--------------------|----------------|
|                    | Infiltrating Ductal Carcinoma | Infiltrating Lobular Carcinoma | Medullary Carcinoma | Metaplastic Carcinoma | Mixed Histology | Mucinous Carcinoma | Other, specify |
| <i>Primary</i>     | 147                           | 23                             | 3                   | 1                     | 1               | 2                  | 5              |
| <i>Progressive</i> | 69                            | 7                              |                     |                       |                 |                    | 1              |
| <i>Proliferous</i> | 331                           | 103                            |                     | 2                     | 20              | 10                 | 22             |
| <i>Perilous</i>    | 80                            | 8                              | 2                   |                       | 2               |                    | 4              |

**Figure S13:** Contingency table of histopathological subtypes relation with discovered subtypes ( $p - value = 0.0001615$  by the chi-square test and  $p - value = 5.4e - 05$  by the Fisher's exact test).

|            | MSDEC Subtypes |             |             |          |
|------------|----------------|-------------|-------------|----------|
|            | Primary        | Progressive | Proliferous | Perilous |
| Luminal A  | 72             | 18          | 338         | 15       |
| Luminal B  | 52             | 16          | 99          | 28       |
| Basal-like | 35             | 30          | 46          | 38       |
| Her2       | 23             | 18          | 16          | 17       |

**Figure S14:** Contingency table of discovered subtypes relation with PAM50 subtypes ( $p$  – value  $< 2.2E - 16$  by the Chi-square test and  $p$  – value  $= 1E - 06$  by the Fisher's exact test).

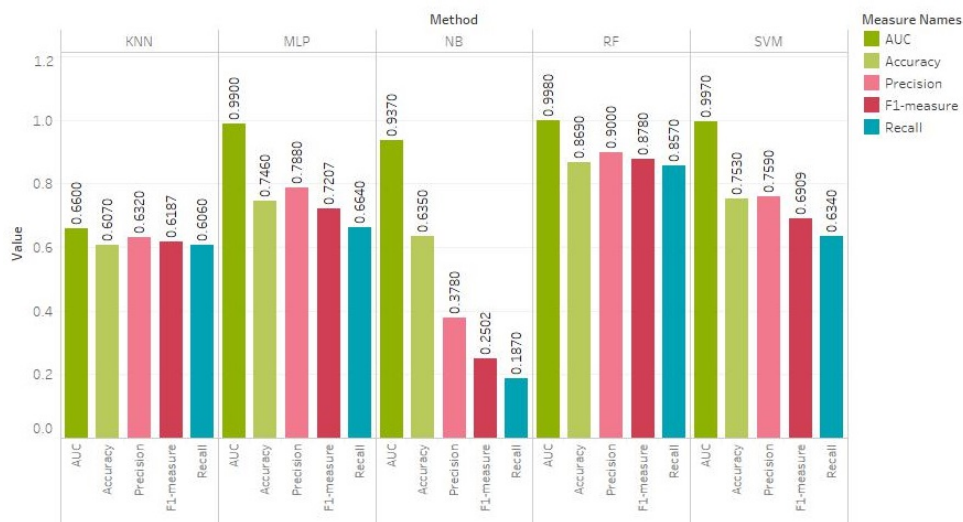

**Figure S15:** Comparison of random forest method with other classification methods.

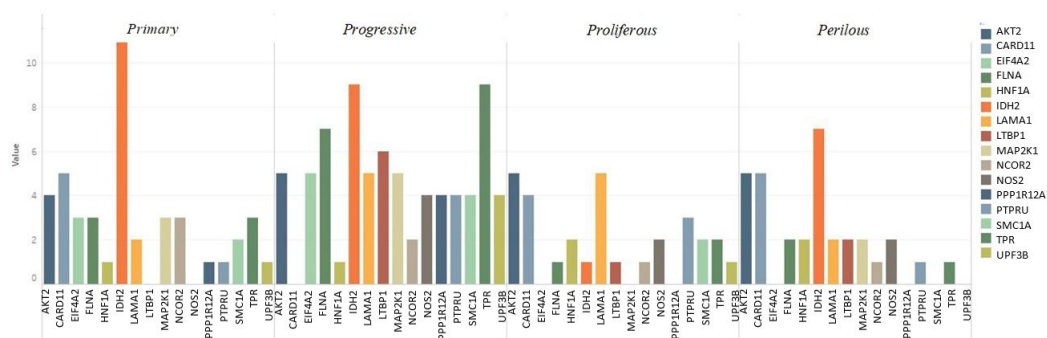

**Figure S16:** Mutational frequency of 16 important genes for classification of tumors in each subtype.

|                                    | cytokines<br>and<br>growth<br>factors | transcription<br>factors | homeodomain<br>proteins | cell<br>differentiation<br>markers | protein<br>kinases | translocated<br>cancer<br>genes | oncogenes | tumor<br>suppressors |
|------------------------------------|---------------------------------------|--------------------------|-------------------------|------------------------------------|--------------------|---------------------------------|-----------|----------------------|
| tumor<br>suppressors               | 0                                     | 1                        | 0                       | 1                                  | 0                  | 0                               | 0         | 4                    |
| oncogenes                          | 0                                     | 1                        | 0                       | 0                                  | 0                  | 2                               | 3         |                      |
| translocated<br>cancer genes       | 0                                     | 1                        | 0                       | 0                                  | 0                  | 2                               |           |                      |
| protein<br>kinases                 | 0                                     | 0                        | 0                       | 0                                  | 4                  |                                 |           |                      |
| cell<br>differentiation<br>markers | 0                                     | 0                        | 0                       | 3                                  |                    |                                 |           |                      |
| homeodomain<br>proteins            | 0                                     | 0                        | 0                       |                                    |                    |                                 |           |                      |
| transcription<br>factors           | 0                                     | 6                        |                         |                                    |                    |                                 |           |                      |
| cytokines and<br>growth<br>factors | 1                                     |                          |                         |                                    |                    |                                 |           |                      |

Figure S17: Family of gene signature in *Primary* subtype.

|                                    | cytokines<br>and<br>growth<br>factors | transcription<br>factors | homeodomain<br>proteins | cell<br>differentiation<br>markers | protein<br>kinases | translocated<br>cancer<br>genes | oncogenes | tumor<br>suppressors |
|------------------------------------|---------------------------------------|--------------------------|-------------------------|------------------------------------|--------------------|---------------------------------|-----------|----------------------|
| tumor<br>suppressors               | 0                                     | 2                        | 0                       | 0                                  | 1                  | 0                               | 0         | 8                    |
| oncogenes                          | 0                                     | 3                        | 0                       | 4                                  | 6                  | 5                               | 15        |                      |
| translocated<br>cancer genes       | 0                                     | 2                        | 0                       | 1                                  | 2                  | 5                               |           |                      |
| protein<br>kinases                 | 0                                     | 0                        | 0                       | 4                                  | 10                 |                                 |           |                      |
| cell<br>differentiation<br>markers | 0                                     | 0                        | 0                       | 6                                  |                    |                                 |           |                      |
| homeodomain<br>proteins            | 0                                     | 0                        | 0                       |                                    |                    |                                 |           |                      |
| transcription<br>factors           | 0                                     | 11                       |                         |                                    |                    |                                 |           |                      |
| cytokines and<br>growth<br>factors | 0                                     |                          |                         |                                    |                    |                                 |           |                      |

Figure S18: Family of gene signature in *Progressive* subtype.

|                                    | cytokines<br>and<br>growth<br>factors | transcription<br>factors | homeodomain<br>proteins | cell<br>differentiation<br>markers | protein<br>kinases | translocated<br>cancer<br>genes | oncogenes | tumor<br>suppressors |
|------------------------------------|---------------------------------------|--------------------------|-------------------------|------------------------------------|--------------------|---------------------------------|-----------|----------------------|
| tumor<br>suppressors               | 0                                     | 2                        | 0                       | 0                                  | 2                  | 0                               | 0         | 6                    |
| oncogenes                          | 0                                     | 3                        | 0                       | 1                                  | 2                  | 8                               | 14        |                      |
| translocated<br>cancer genes       | 0                                     | 2                        | 0                       | 0                                  | 0                  | 9                               |           |                      |
| protein<br>kinases                 | 0                                     | 0                        | 0                       | 2                                  | 9                  |                                 |           |                      |
| cell<br>differentiation<br>markers | 0                                     | 0                        | 0                       | 2                                  |                    |                                 |           |                      |
| homeodomain<br>proteins            | 0                                     | 0                        | 0                       |                                    |                    |                                 |           |                      |
| transcription<br>factors           | 0                                     | 8                        |                         |                                    |                    |                                 |           |                      |
| cytokines and<br>growth<br>factors | 0                                     |                          |                         |                                    |                    |                                 |           |                      |

Figure S19: Family of gene signature in *Proliferous* subtype.



|                                    | cytokines<br>and<br>growth<br>factors | transcription<br>factors | homeodomain<br>proteins | cell<br>differentiation<br>markers | protein<br>kinases | translocated<br>cancer<br>genes | oncogenes | tumor<br>suppressors |
|------------------------------------|---------------------------------------|--------------------------|-------------------------|------------------------------------|--------------------|---------------------------------|-----------|----------------------|
| tumor<br>suppressors               | 0                                     | 2                        | 0                       | 0                                  | 0                  | 0                               | 0         | 4                    |
| oncogenes                          | 0                                     | 2                        | 0                       | 0                                  | 1                  | 6                               | 8         |                      |
| translocated<br>cancer genes       | 0                                     | 2                        | 0                       | 0                                  | 0                  | 6                               |           |                      |
| protein<br>kinases                 | 0                                     | 0                        | 0                       | 1                                  | 6                  |                                 |           |                      |
| cell<br>differentiation<br>markers | 0                                     | 0                        | 0                       | 2                                  |                    |                                 |           |                      |
| homeodomain<br>proteins            | 0                                     | 0                        | 0                       |                                    |                    |                                 |           |                      |
| transcription<br>factors           | 0                                     | 8                        |                         |                                    |                    |                                 |           |                      |
| cytokines and<br>growth<br>factors | 0                                     |                          |                         |                                    |                    |                                 |           |                      |

**Figure S20:** Family of gene signature in *Perilous* subtype.

## 1.2 Tables

| Complex Name                                                                  | Proteins                                                                 |
|-------------------------------------------------------------------------------|--------------------------------------------------------------------------|
| <i>NCOR complex</i>                                                           | NCOR1, HDAC3, GPS2, TBL1XR1, TBL1X, CORO2A                               |
| <i>SMRT complex</i>                                                           | TBL1X, TBL1XR1, GPS2, HDAC3, NCOR2                                       |
| <i>Kaiso – NCOR complex</i>                                                   | CORO2A, TRIM33, TBL1X, TBL1XR1, GPS2, HDAC3, KIF11, KDM4A, NCOR1, ZBTB33 |
| <i>NCOR – HDAC3 complex</i>                                                   | TBL1X, TBL1XR1, GPS2, HDAC3, NCOR1                                       |
| <i>Polycystin – 1 – E – cadherin – beta – catenin complex</i>                 | CDH1, CTNNB1, PKD1                                                       |
| <i>p27 – cyclinE – CDK2 complex</i>                                           | CDK2, CDKN1B, CCNE1                                                      |
| <i>p27 – cyclinE – Cdk2 – Ubiquitin E3 ligase complex</i>                     | SKP1A, SKP2, CUL1, CKS1B, RBX1, CCNE1, CDKN1B, CDK2                      |
| <i>Polycystin – 1 – E – cadherin – beta – catenin – Flotillin – 2 complex</i> | CDH1, CTNNB1, FLOT2, PKD1                                                |
| <i>Polycystin – 1 multiprotein complex</i>                                    | ACTN1, CDH1, SRC, JUP, VCL, CTNNB1, PXN, BCAR1, PKD1, PTK2, TLN1         |

**Table S1.** Protein complexes of *Primary* subtype.

| Complex Name                                          | Proteins                                               |
|-------------------------------------------------------|--------------------------------------------------------|
| <i>BRCC complex</i>                                   | BRE, BRCA1, BRCA2, RAD51, BRCC3                        |
| <i>MSH26 – BLM – p53 – RAD51 complex</i>              | BLM, TP53, MSH2, MSH6, RAD51                           |
| <i>BRCA1 – BARD1 – BACH1 – DNA damage complex II</i>  | BARD1, BRCA1, RBBP8, RAD50, TOPBP1, MRE11A, NBN, BACH1 |
| <i>BRCA1 – BARD1 – BACH1 – DNA damage complex I</i>   | BARD1, BRCA1, MLH1, MSH6, TOPBP1, BACH1                |
| <i>BRCA1 – BARD1 – BACH1 – DNA damage complex III</i> | BARD1, BRCA1, RBBP8, RAD50, TOPBP1, MRE11A, NBN, BACH1 |
| <i>BRCA1A complex</i>                                 | FAM175A, UIMC1, BARD1, BRCA1                           |
| <i>BRCA1C complex</i>                                 | UIMC1, BARD1, BRCA1, RBBP8                             |
| <i>BRCA1B complex</i>                                 | BARD1, BRCA1, BACH1                                    |
| <i>BRCA1 – CTIP – ZBRK1 repressor complex</i>         | BRCA1, RBBP8, ZNF350                                   |
| <i>BARD1 – BRCA1 – CSTF64 complex</i>                 | BARD1, BRCA1, CSTF2                                    |
| <i>BRAF53 – BRCA2 complex</i>                         | BRCA2, HDAC1, HDAC2, KDM1A, PHF21A, RCOR1, HMG20B      |
| <i>BRCA1 – BARD1 – POLR2A complex</i>                 | BARD1, BRCA1, POLR2A                                   |
| <i>BRCA1 – CtIP – CtBP complex</i>                    | BRCA1, CTBP1, RBBP8                                    |
| <i>BRCA1 – LMO4 – CTIP complex</i>                    | BRCA1, RBBP8, LMO4                                     |
| <i>BRCA1 – BARD1 – UbcH7c complex</i>                 | BARD1, BRCA1, UBE2L3                                   |

**Table S2.** Protein complexes of *Progressive* subtype.

| Complex Name                             | Proteins                                               |
|------------------------------------------|--------------------------------------------------------|
| <i>Paf complex</i>                       | PAF1, CTR9, LEO1, WDR61                                |
| <i>p27 – cyclinE – CDK2 complex</i>      | CDK2, CDKN1B, CCNE1                                    |
| <i>MDC1 – MRN – ATM – FANCD2 complex</i> | MRE11A, FANCD2, MDC1, NBN, ATM, RAD50                  |
| <i>MDC1 – H2AFX – TP53BP1 complex</i>    | H2AFX, MDC1, TP53BP1                                   |
| <i>MDC1 – p53BP1 – SMC1 complex</i>      | MDC1, SMC1A, TP53BP1                                   |
| <i>SH3KBP1 – CBLB – EGFR complex</i>     | CBLB, EGFR, SH3KBP1                                    |
| <i>E2F4 – p130 complex</i>               | RBL2, E2F4                                             |
| <i>CIN85 – CBL complex</i>               | CBL, SH3KBP1                                           |
| <i>MLL – HCF complex</i>                 | SERPIND1, KMT2A, HCFC1, MEN1, MEN1, KDM6B, ASH2L, WDR5 |
| <i>RAB5 – EEA1 complex</i>               | EEA1, RAB5A                                            |
| <i>EGFR – CBL – GRB2 complex</i>         | CBL, EGFR, GRB2                                        |
| <i>NCOR complex</i>                      | NCOR1, HDAC3, GPS2, TBL1XR1, TBL1X, CORO2A             |
| <i>SMRT complex</i>                      | TBL1X, TBL1XR1, GPS2, HDAC3, NCOR2                     |
| <i>SMRT core complex</i>                 | TBL1X, HDAC3, NCOR2                                    |

**Table S3.** Protein complexes of *Proliferous* subtype.

| <i>Complex Name</i>                      | <i>Proteins</i>                                                                         |
|------------------------------------------|-----------------------------------------------------------------------------------------|
| <i>Anaphase – promoting complex</i>      | ANAPC1, ANAPC10, ANAPC2, ANAPC4, ANAPC5, ANAPC7, CDC16, CDC23, CDC27                    |
| <i>SHARP – CtBP complex</i>              | CTBP1, CTBP2, SPEN                                                                      |
| <i>MDC1 – H2AFX – TP53BP1 complex</i>    | H2AFX, MDC1, TP53BP1                                                                    |
| <i>MDC1 – p53BP1 – SMC1 complex</i>      | MDC1, SMC1A, TP53BP1                                                                    |
| <i>JAK2 – PAFR – TYK2 complex</i>        | PTAFR, JAK2, TYK2                                                                       |
| <i>Hes1 – Tle1 complex</i>               | Hes1, Tle1                                                                              |
| <i>PLCB1 – PARD3 – PARD6A complex</i>    | PLCB1, PARD3, PARD6A                                                                    |
| <i>RSmad complex</i>                     | ARID1B, CREBBP, TRIM33, SMAD2, SMAD3, NCOA3, SMAD4, SMARCC1, SMARCC2, SMARCA4 (BAF190A) |
| <i>PTIP – HMT complex</i>                | KMT2B, KMT2C, KDM6A, NCOA6, PAXIP1, PAGR1, DPY30, KDM6B, ASH2L, WDR5                    |
| <i>UTX – MLL2/3 complex</i>              | KMT2C, KMT2D, KDM6A, N4BP2, NCOA6, PAXIP1, PROSER1, KDM6B, PPP6R3, ASH2L, WDR5, ZNF281  |
| <i>ITGAV – ITGB3 – LAMA4 complex</i>     | ITGAV, ITGB3, LAMA4                                                                     |
| <i>HES1 promoter corepressor complex</i> | CREBBP, CDK7, POLR2A, EP300, RBPJ, SUPT6H                                               |
| <i>ESR1 – MDM4 complex</i>               | ESR1, MDM4                                                                              |

**Table S4.** Protein complexes of *Perilous* subtype.
